# Supplementary material for: Determination of bismuth(iii) in environmental and pharmaceutical samples using an organic reagent
Source: Royal Society of Chemistry journal article supplement (doi:10.1039/c7ay00412e), 2017-01-01
Supplement: c7ay00412e1.pdf [file c7ay00412e1.pdf]

# List of Figures:

Figure S1. FTIR of N-octylacetamide

Figure S2.  $^1\text{H}$  NMR spectra of N-octylacetamide made in  $\text{CDCl}_3$

Figure S3.  $^{13}\text{C}$  NMR spectra of N-octylacetamide made in  $\text{CDCl}_3$

Figure S4. Images of coloured complex in organic extract where 1<sup>st</sup> vial is blank [Bi (III) absent], 2<sup>nd</sup> vial is Bi (III)-I<sup>-</sup> complex and 3<sup>rd</sup> vial is Bi (III)-I<sup>-</sup>-N-OAA complex

Figure S1.

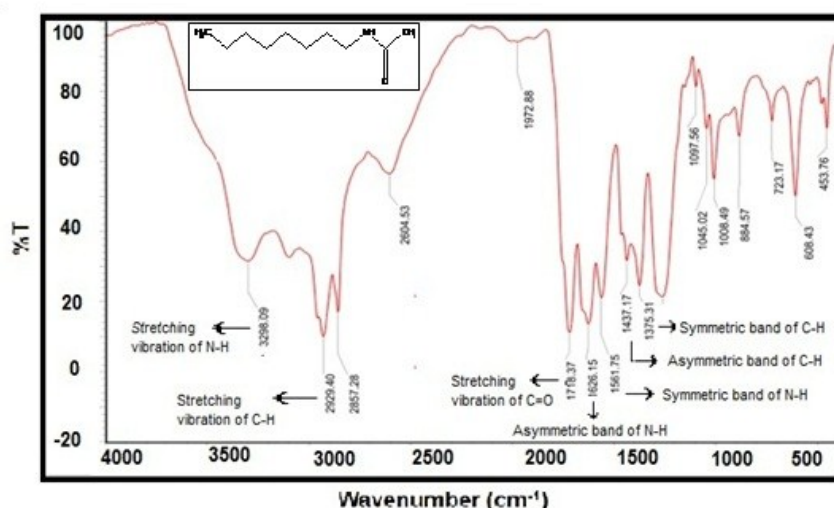

Figure S2.

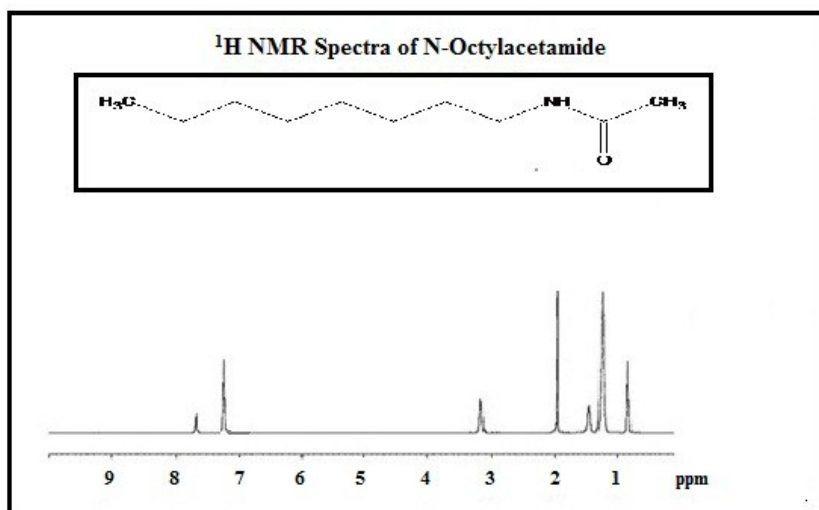

**Figure S3.**

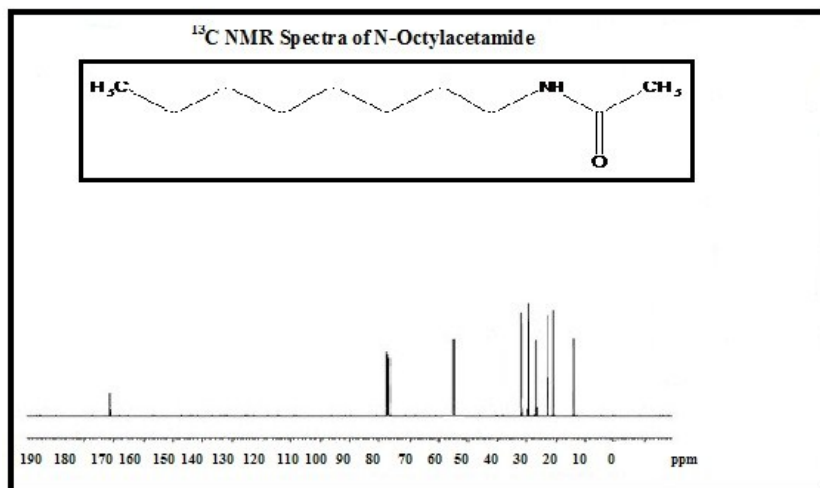

**Figure S4.**

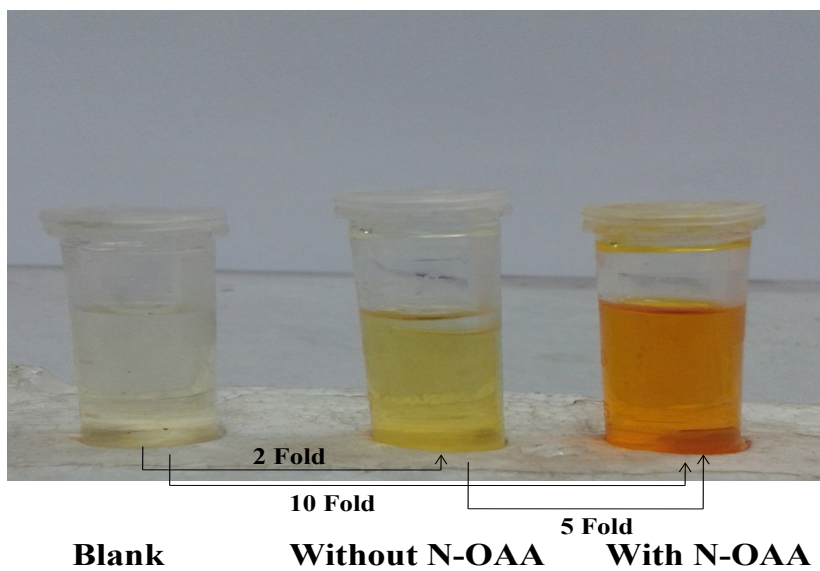

**Table S1. FTIR Characterization details of N-OAA.**

**Table S2. Effect of different amides at  $\lambda_{\text{max}}$  365 nm.**

**Table S3. Statistical data calculation.**

**Table S1**

| <b>S.<br/>No.</b> | <b>Functional Group</b>                  | <b>Band(cm<sup>-1</sup>)</b> |
|-------------------|------------------------------------------|------------------------------|
| <b>1</b>          | <b>Amide Carbonyl(C=O)</b>               | <b>1718.37</b>               |
| <b>2</b>          | <b>Stretching Vibration of N-H</b>       | <b>3298.09</b>               |
| <b>3</b>          | <b>Symmetric /Asymmetric band of N-H</b> | <b>1561.75-1626.15</b>       |
| <b>4</b>          | <b>Stretching Vibration of C-H</b>       | <b>2829.40</b>               |
| <b>5</b>          | <b>Symmetric/Asymmetric band of C-H</b>  | <b>1375.31-1437.17</b>       |

**Table S2**

| <b>S. no.</b> | <b>Amides</b>            | <b>Molecular<br/>Formula</b>                         | <b>Molar<br/>Absorptivity<br/><math>\epsilon</math><br/>(L/mol/cm)</b> |
|---------------|--------------------------|------------------------------------------------------|------------------------------------------------------------------------|
| <b>1.</b>     | <b>N-butylacetamide</b>  | <b>C<sub>4</sub>H<sub>9</sub>NHCOCH<sub>3</sub></b>  | <b>2.0X10<sup>3</sup></b>                                              |
| <b>2.</b>     | <b>N-phenylacetamide</b> | <b>C<sub>6</sub>H<sub>5</sub>NHCOCH<sub>3</sub></b>  | <b>1.7X10<sup>4</sup></b>                                              |
| <b>3.</b>     | <b>N-hexylacetamide</b>  | <b>C<sub>6</sub>H<sub>13</sub>NHCOCH<sub>3</sub></b> | <b>4.4X10<sup>3</sup></b>                                              |
| <b>4.</b>     | <b>N-octylacetamide</b>  | <b>C<sub>8</sub>H<sub>17</sub>NHCOCH<sub>3</sub></b> | <b>7.2X10<sup>5</sup></b>                                              |

**Table S3**

| <b>No. of<br/>determination</b> | <b>Concentration of<br/>Bi(III) <math>\mu\text{g/mL}</math></b> | <b>Absorbance at<br/><math>\lambda_{\text{max } 365\text{nm}}</math></b> | <b>Statistical Data</b>                                                                    |
|---------------------------------|-----------------------------------------------------------------|--------------------------------------------------------------------------|--------------------------------------------------------------------------------------------|
| 6                               | 1.0                                                             | 0.342<br>0.347<br>0.352<br>0.341<br>0.350<br>0.343                       | Mean Abs.= 0.345<br>St. Dev.= 0.005<br>RSD= $\pm 1.44\%$<br>Dt. Limit=36.0 $\mu\text{g/L}$ |
